# Supplementary material for: An innate granuloma eradicates an environmental pathogen using Gsdmd and Nos2
Source: PubMed Central journal article supplement (PMC10590453; doi:10.1038/s41467-023-42218-1), 2023-10-21
Supplement: 41467_2023_42218_MOESM3_ESM.pdf [file 41467_2023_42218_MOESM3_ESM.pdf]

## **Description of Additional Supplementary Files**

File Name: Supplementary Data 1

Description: Raw dataset generated from spatial transcriptomics.

File Name: Supplementary Data 2

Description: Code used for analyzing spatial transcriptomic data.
