# Supplementary material for: An innate granuloma eradicates an environmental pathogen using Gsdmd and Nos2
Source: PubMed Central journal article supplement (PMC10590453; doi:10.1038/s41467-023-42218-1), 2023-10-21
Supplement: 41467_2023_42218_MOESM5_ESM.pdf [file 41467_2023_42218_MOESM5_ESM.pdf]

## Spatial Transcriptomics data analysis using R codes:

```
library(Seurat)
library(tidyverse)
library(showtext)
library(scales)
library(RColorBrewer)
```

#Fig 5a – Spatial Feature Plots of Clusters

```
Liver_Spatial <- readRDS("/Users/eam119/Documents/RStudio/merged8_clustree.rds")
Idents(Liver_Spatial) <- Liver_Spatial$SCT_snn_res.0.9
mylist <- hue_pal()(16)
Liver_Spatial <- RunPCA(Liver_Spatial, assay = "SCT", verbose = FALSE)
Liver_Spatial <- FindNeighbors(Liver_Spatial, reduction = "pca", dims = 1:30)
Liver_Spatial <- FindClusters(Liver_Spatial, verbose = FALSE)
Liver_Spatial <- RunUMAP(Liver_Spatial, reduction = "pca", dims = 1:30)
DimPlot(Liver_Spatial, reduction = "umap", label = TRUE)
```

For #Fig 5b-e

```
font_add(family = "Arial", regular = "Arial.ttf") #Prepare Arial font for use in figures
showtext_auto() #Tell system to use showtext to generate fonts by default
```

#Load dataset and color palette

```
df <- readRDS("~/Desktop/merged8_clustree.rds")
Idents(df) <- df$SCT_snn_res.0.9
mylist <- hue_pal()(16)
```

```
#[1] "#F8766D" "#E68613" "#CD9600" "#ABA300" "#7CAE00" "#0CB702" "#00BE67" "#00C19A"
"#00BFC4" "#00B8E7" "#00A9FF" "#8494FF" "#C77CFF" "#ED68ED" "#FF61CC" "#FF68A1"
```

#Fig 5b and S4b - DimPlot with \*numbered clusters\* and Arial font for all text and points

```
DimPlot(df) %>% LabelClusters(id = "ident", repel = F) +
theme(text=element_text(family="Arial")) + NoLegend()
```

#Fig 5c, S4c, and S4d - Dimplot with grayed-out Ptprc low/- clusters

```
levels(df) <- c("5", "11", "9", "8", "6", "0", "15", "2", "1", "12", "4", "14", "3", "7", "13", "10") #Reorder
clusters based on physical location in the granuloma - approximately center of granuloma to
edge
df <- RenameIdents(df, "5" = "NC-C", "11" = "NC-P", "9" = "CN", "8" = "CN-M1", "6" = "CN-M2", "0"
= "M",
      "15" = "OG", "2" = "HEP", "1" = "HEP", "12" = "HEP", "4" = "HEP", "14" = "HEP", "3" =
"HEP", "7" = "HEP",
```

```

    "13" = "EC", "10" = "EC") #Renaming clusters based on physical location in the
granuloma and gene expression
df[["zones"]] <- Idents(df) #Save new labels as "zones"
#FeaturePlot(df, c("Ptprc"), max.cutoff = 1.5) + scale_colour_gradientn(colours =
rev(brewer.pal(n = 7, name = "RdBu"))) + theme(text=element_text(family="Arial")) #Check
Ptprc expression to confirm cluster selections
DimPlot(df, cols = c(mylist[6],mylist[12],mylist[10],mylist[9],mylist[7],mylist[1],
mylist[16],"grey","grey")) %>% LabelClusters(id = "ident", family = "Arial",
repel = F) + theme(text=element_text(family="Arial"))

```

#Fig 5d - Modules Over Real Time Violin Plot - All Spots

```

### create gene module lists
pmn.list <- list(c("S100a8", "S100a9", "Cd33", "Csf3r", "Ccl3"))
mo.list <- list(c("Ly6c2", "Ccr2", "Fcgr3", "Cd14", "Itgam"))
mac.list <- list(c("Aif1", "Adgre1", "Fcgr1", "Cd68", "C1qa", "C1qb", "C1qc"))
t.list <- list(c("Cd3d", "Cd3e", "Cd3g", "Trac"))
fibro.list <- list(c("Col1a1", "Col1a2", "Col3a1", "Col5a1", "Col5a2"))
hep.list <-
list(c("Fabp1", "Mup20", "Apoa2", "Apoc1", "Mup3", "Apoc3", "Scd1", "Rbp4", "Serpina3k", "Alb"))
ec.list <- list(c("Clec4g", "Kdr", "Aqp1", "Ptprb", "Fabp4"))
### add gene module scores
df <- AddModuleScore(df, features = pmn.list, name = "PMN_score")
df <- AddModuleScore(df, features = t.list, name = "T_score")
df <- AddModuleScore(df, features = mo.list, name = "MO_score")
df <- AddModuleScore(df, features = mac.list, name = "MAC_score")
df <- AddModuleScore(df, features = fibro.list, name = "FIBRO_score")
df <- AddModuleScore(df, features = hep.list, name = "HEP_score")
df <- AddModuleScore(df, features = ec.list, name = "EC_score")

```

```

df$library <- factor(df$library, c("1_12_hpi", "7_24_hpi", "9_3_dpi", "10_5_dpi", "11_7_dpi",
"12_10dpi", "13_14dpi", "14_21dpi")) #Reordering the timepoints
Timepoints <- c("0.5dpi", "1dpi", "3dpi", "5dpi", "7dpi", "10dpi", "14dpi", "21dpi") #New names
for the timepoints
levels(df$library) <- Timepoints #Renaming timepoints using the list generated
Idents(df) <- factor(df$library) #Setting Timepoints as Idents
colnames(df@meta.data)[21:27] <- c("Neutrophil", "T Cell", "Monocyte", "Macrophage",
"Fibroblast", "Hepatocyte", "Endothelial Cell") #Rename module scores to associated cell
annotation
VlnPlot(df, c("Neutrophil", "Monocyte", "Macrophage", "T Cell", "Fibroblast"),
ncol = 5, pt.size = 0) &
ylim(-2,4) &
theme(text=element_text(family="Arial"))

```

#Fig 5e - Module Analysis Dot Plot

```

idents(df) <- df$zones #Change idents to physical zone labels
p0 <- DotPlot(df,features = c("Neutrophil","Monocyte", "Macrophage","T Cell", "Fibroblast",
"Hepatocyte", "Endothelial Cell"),scale = T,dot.scale = 6) #Create and store dotplot based on
module scores of each zone in respect to each cell type
p0 + scale_colour_gradientn(colours = (brewer.pal(n = 7, name = "YlOrRd"))) + #Update visuals
of dotplot
  theme_grey(base_size = 14) +
  RotatedAxis() +
  scale_y_discrete(limits=rev) + xlab("Module") +
  ylab("Zone") +
  guides(size = guide_legend(title.position="left", title.hjust = 0.5, guide_legend(title = "%
Exp.")), colour = guide_colourbar(title.position="left", title.hjust = 1, title = "Average Exp.)) +
  theme(legend.title = element_text(angle = 90)) +
  theme(text=element_text(family="Arial"))

```

```

#Fig 5f, 6f, and S4a – Spatial Feature Plots of indicated genes
SpatialDimPlot(Liver_Spatial)& NoLegend()
SpatialFeaturePlot(Liver_Spatial, "Trem2", crop = F, ncol = 4) & scale_fill_gradientn(colours =
rev(brewer.pal(n = 11, name = "RdYlBu")), limits = c(0,3), oob=squish)

```
